# Supplementary material for: Simultaneous synthesis of hydroxyapatite fibres and β-tricalcium phosphate particles via a water controlled-release solvothermal process
Source: Royal Society of Chemistry journal article supplement (doi:10.1039/d2ce01703b), 2023-01-01
Supplement: d2ce01703b1.pdf [file d2ce01703b1.pdf]

## Electronic Supplementary Information

### **Simultaneous synthesis of hydroxyapatite fibres and $\beta$ -tricalcium phosphate particles *via* a water controlled-release solvothermal process**

Tomoyo Goto <sup>a,b,\*</sup>, Shu Yin <sup>c,d</sup>, Yusuke Asakura <sup>e</sup>, Sung Hun Cho <sup>a</sup>, Tohru Sekino <sup>a</sup>

<sup>a</sup> SANKEN (The Institute of Scientific and Industrial Research), Osaka University, 8-1 Mihogaoka, Ibaraki, Osaka 567-0047, Japan

<sup>b</sup> Institute for Advanced Co-Creation Studies, Osaka University, 1-1 Yamadaoka, Suita, Osaka 565-0871, Japan

<sup>c</sup> Institute of Multidisciplinary Research for Advanced Material (IMRAM), Tohoku University, 2-1-1 Katahira, Aoba-Ku, Sendai, Miyagi 980-0877, Japan

<sup>d</sup> Advanced Institute for Materials Research (WPI-AIMR), Tohoku University, 2-1-1, Katahira, Aoba-ku, Sendai 980-0877, Japan

<sup>e</sup> Kagami Memorial Research Institute for Materials Science and Technology, Waseda University, 2-8-26 Nishiwaseda, Shinjuku-ku, Tokyo 169-0051, Japan

\*Corresponding author: Tomoyo Goto

Phone: +81-6-6879-8437, Fax: +81-6-6879-8439

E-mail: goto@sanken.osaka-u.ac.jp

## **Table of contents**

|                         | <b>Pages</b>    |
|-------------------------|-----------------|
| <b>Characterization</b> | <b>S3 – S4</b>  |
| <b>Fig. S1–S7</b>       | <b>S5 – S11</b> |
| <b>Table S1–S2</b>      | <b>S12</b>      |

## Characterization

The crystallinity of products was identified by powder X-ray diffraction (XRD, D8 ADVANCE, Bruker AXS, Germany) using CuK $\alpha$  radiation at 40 kV and 40 mA. The fraction of each crystal phases ( $F$ ) were calculated semi-quantitatively from XRD data using following equation:

$$F(\%) = \frac{I}{I_{HAP} + I_{\alpha-TCP} + I_{\beta-TCP} + I_{DCPA}} \times 100$$

$I_{HAP}$  is the integrated intensity of the HAP of 211 reflection at 31.8°,  $I_{\alpha-TCP}$ ,  $I_{\beta-TCP}$ , and  $I_{DCPA}$  are the integrated intensities of the  $\alpha$ -TCP of 132 reflection at 24.18°, the  $\beta$ -TCP of 214 reflection at 27.88°, the DCPA of 002 reflection at 26.48°, respectively.

The crystal morphology, structure and size were observed by field emission scanning electron microscopy (FE-SEM, SU9000 Hitachi High-Tech Corporation, Tokyo, Japan) and transmission electron microscopy (TEM, JEM-ARM 200F, JEOL Ltd., Tokyo, Japan). Elemental analysis of the samples were also investigated energy-dispersive X-ray spectroscopy (EDX, JED-2200, JEOL Ltd., Tokyo, Japan) attached to TEM. The chemical composition of samples were measured using the Fourier Transform Infrared Spectroscopy (FT-IR, FT/IR 4100, JASCO Co., Tokyo, Japan) using KBr pellet method.

The specific surface area (SSA) of the samples were analyzed by multi-point BET method using the nitrogen (N<sub>2</sub>) adsorption isotherm collected at -196 °C using NOVA 4200e (Quantachrome Instruments, FL, USA). Zeta potential of samples were measured using the electrophoretic method on an analyzer (Zetasizer Nano ZS, Malvern Instruments Ltd, Malvern, UK).

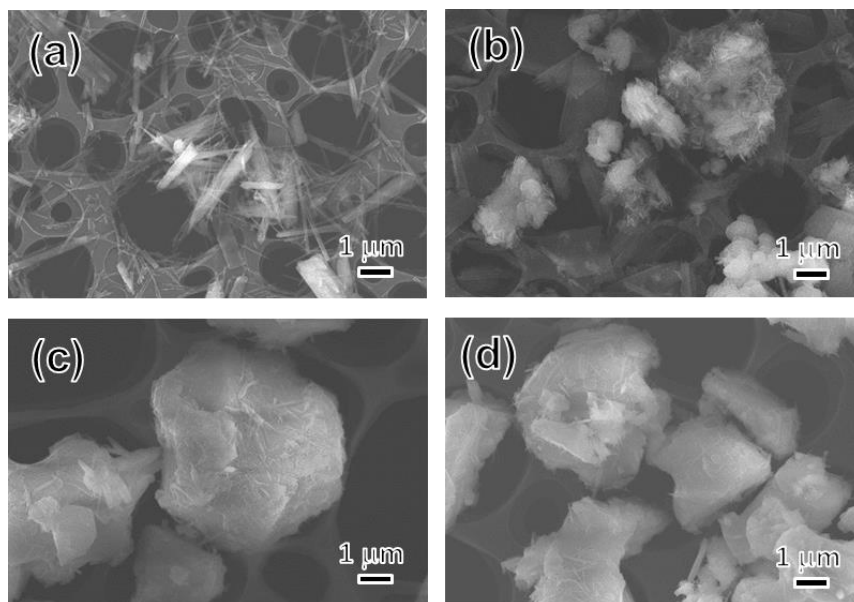

**Fig. S1** Scanning Electron Microscope (SEM) images of the products after solvothermal treatment at 150 °C for 24 h, using an ethanol-acetic acid system. (a) Water, (b) E00A20, (c) E20A00, and (d)  $\alpha$ -TCP.

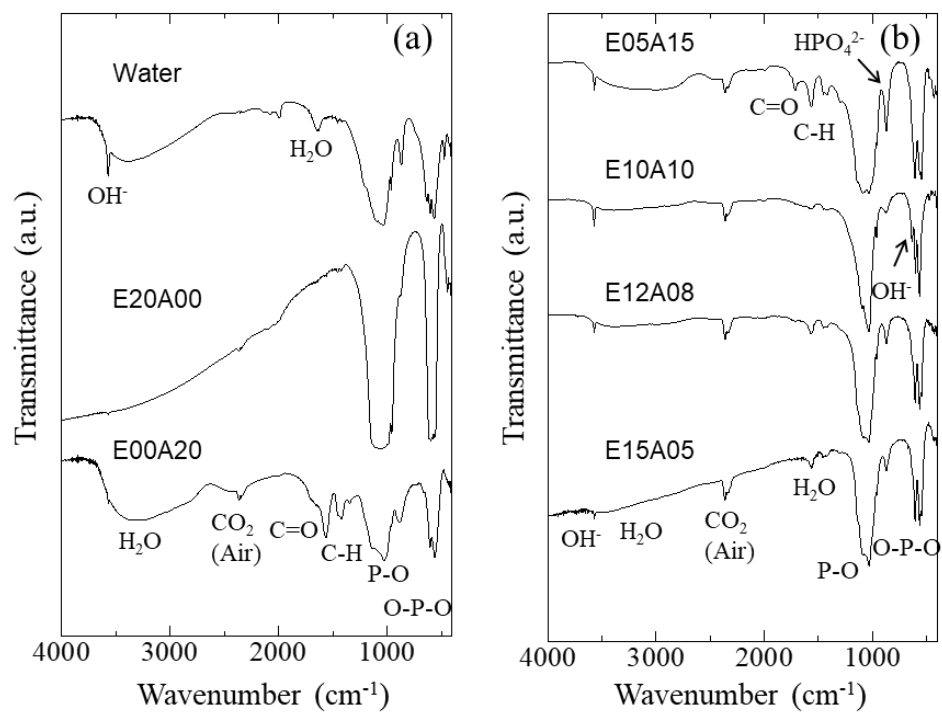

**Fig. S2** FT-IR spectra of the products after solvothermal treatment using (a) water, ethanol, and acetic acid and (b) mixed solvents.

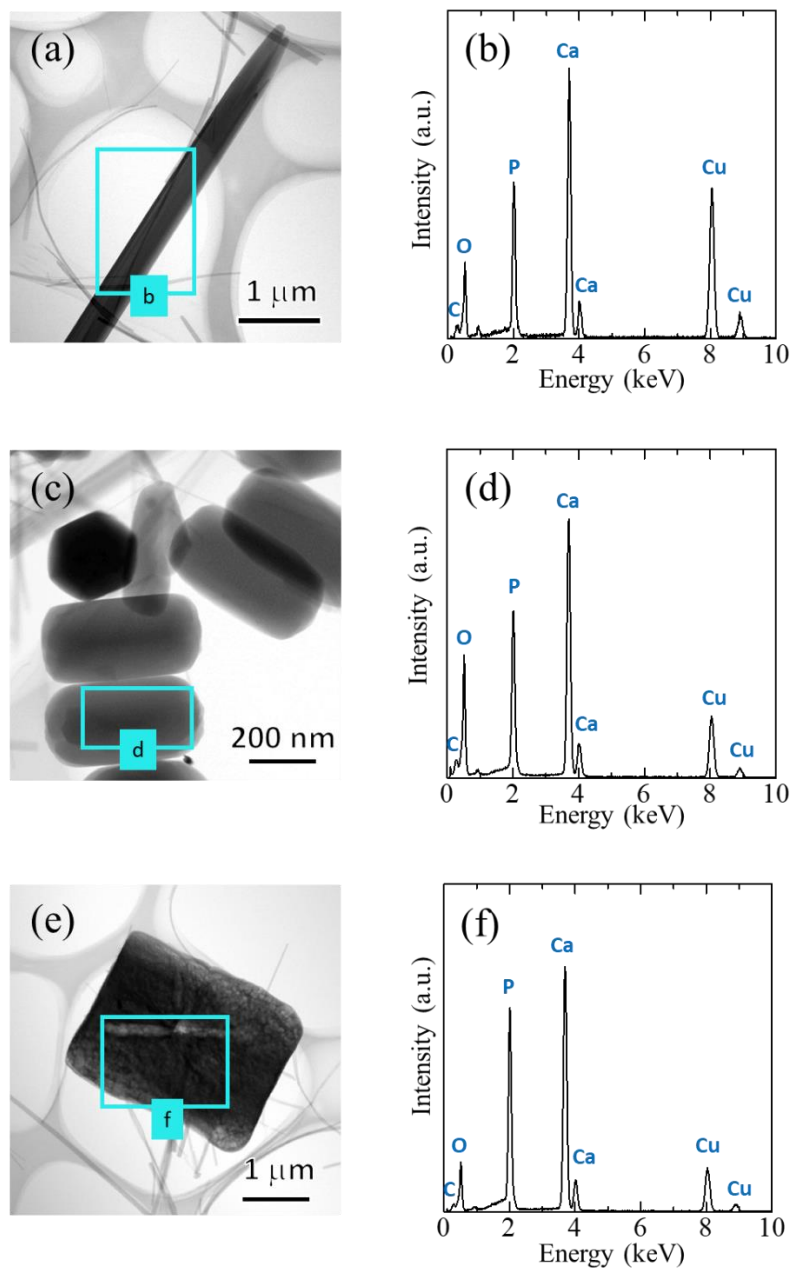

**Fig. S3** TEM images and EDX spectra of different crystals via TEM-EDX analysis: (a, b) needle-shape crystal, (c, d) rice-like crystal, and (e, f) plate-shape crystal. The frame in TEM image shows the EDX analysis area.

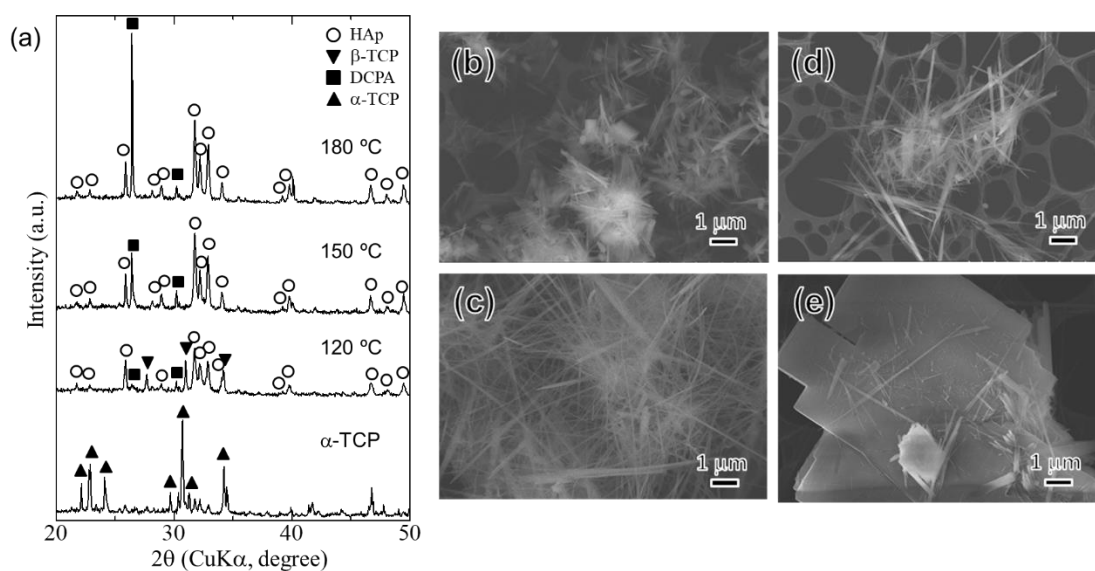

**Fig. S4** (a) XRD patterns and (b–e) SEM images of the products after the solvothermal treatment at various temperatures using E10A10 with constant stirring: (b) 120, (c) 150, and (d, e) 180 °C.



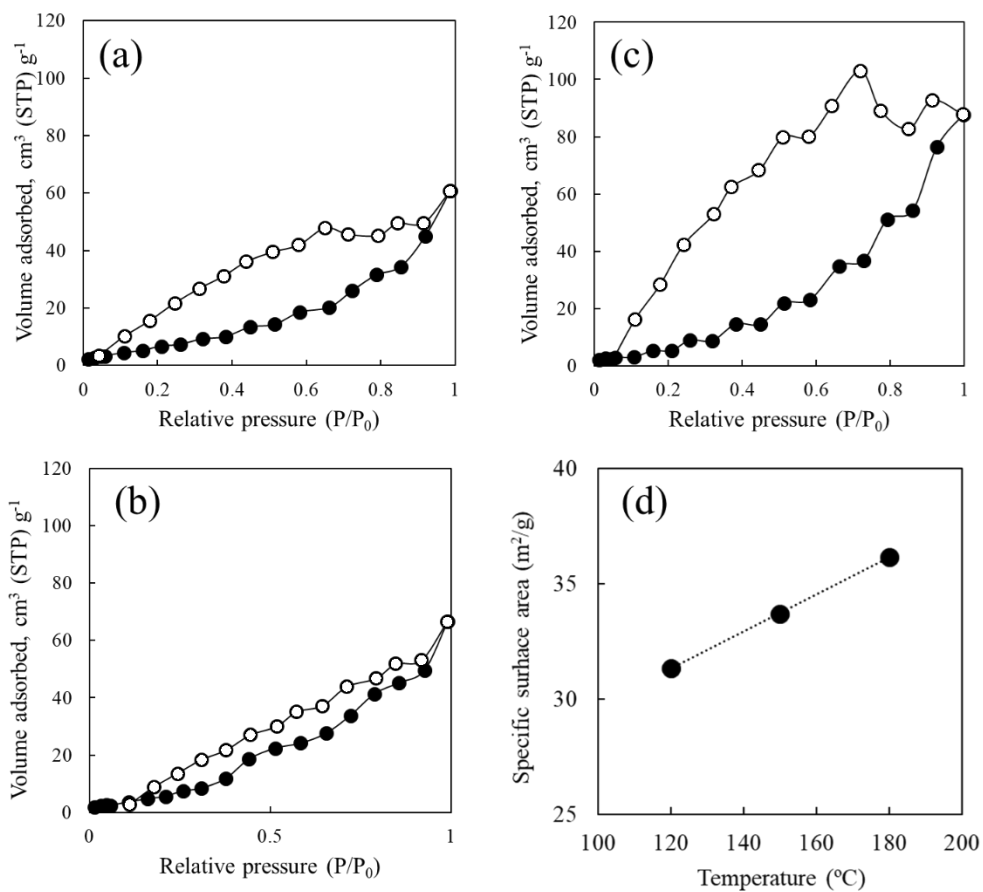

**Fig. S5** N<sub>2</sub> adsorption-desorption isotherm of the samples solvothermally synthesised at (a) 120, (b) 150, and (c) 180 °C, and (d) their specific surface areas.

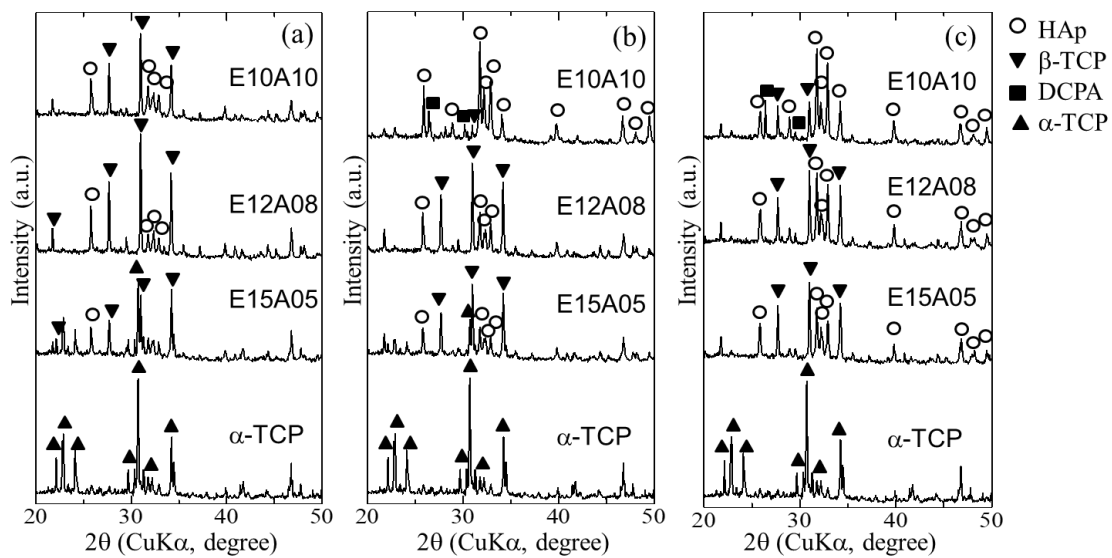

**Fig. S6** XRD patterns of the products after solvothermal treatment for 24 h at (a) 120, (b) 150, and (c) 180 °C.

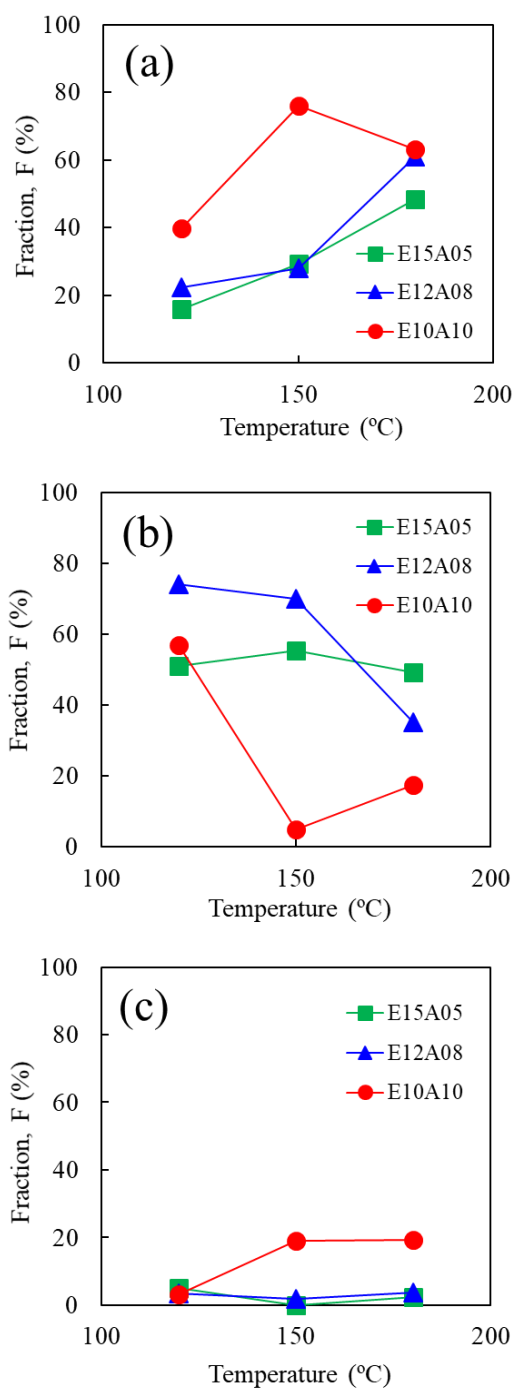

**Fig. S7** Fraction of integrated intensity against the treatment temperature of WCRSP without stirring as derived from the XRD pattern: (a) HAp, (b)  $\beta$ -TCP, and (c) DCPA.

Table S1. Starting materials of solvothermal treatment of  $\alpha$ -TCP using WCRSP

| Notation | Water | Ethanol | Acetic acid | $\alpha$ -TCP |
|----------|-------|---------|-------------|---------------|
|          | (mL)  | (mL)    | (mL)        | (mmol)        |
| E05A15   | 0     | 5       | 15          | 0.81          |
| E10A10   | 0     | 10      | 10          | 0.81          |
| E12A08   | 0     | 12      | 8           | 0.81          |
| E15A05   | 0     | 15      | 5           | 0.81          |
| Water    | 20    | 0       | 0           | 0.81          |
| E20A00   | 0     | 20      | 0           | 0.81          |
| E00A20   | 0     | 0       | 20          | 0.81          |

Table S2. Elemental analysis of each area crystals via TEM-EDX

| Shapes    | Element composition (at. %) |       |       |       |        |      |
|-----------|-----------------------------|-------|-------|-------|--------|------|
|           | Ca                          | P     | O     | C     | Others | Ca/P |
| Needle    | 15.66                       | 24.46 | 6.20  | 28.75 | 24.94  | 0.64 |
| Rice-like | 25.97                       | 33.74 | 18.85 | n.d.* | 21.44  | 0.77 |
| Plate     | 25.21                       | 34.03 | 9.85  | 15.25 | 15.67  | 0.74 |

\*n.d.: not detected
